# Supplementary material for: NiCo LDH nanozymes with selective antibacterial activity against Gram-negative bacteria for wound healing
Source: Royal Society of Chemistry journal article supplement (doi:10.1039/d3tb00957b), 2023-01-01
Supplement: d3tb00957b1.pdf [file d3tb00957b1.pdf]

## Supplementary materials

### **NiCo LDHs nanozyme with selective antibacterial activity against Gram-negative bacteria for wound healing**

Li Su <sup>a,\*,†</sup>, Sainan Qin <sup>a,†</sup>, Xinai Yu <sup>a</sup>, Yifei Chen, <sup>a</sup> Liang Wang <sup>a,\*</sup>, Wenpei Dong <sup>a</sup>, Zhongjian Xie <sup>b,c</sup>,  
\* and Han Zhang <sup>d</sup>

<sup>a</sup> Collaborative Innovation Center of Henan Province for Green Manufacturing of Fine Chemicals, Key Laboratory of Green Chemical Media and Reactions, Ministry of Education, School of Chemistry and Chemical Engineering, Henan Normal University, Xinxiang, Henan 453007, P. R. China.

E-mail: [suli@htu.edu.cn](mailto:suli@htu.edu.cn)

E-mail: [wangliang@htu.edu.cn](mailto:wangliang@htu.edu.cn)

<sup>b</sup> Institute of Pediatrics, Shenzhen Children's Hospital, Shenzhen 518038, Guangdong, P. R. China.

<sup>c</sup> Shenzhen International Institute for Biomedical Research, Shenzhen 518116, Guangdong, China.

E-mail: [zjxie2011@163.com](mailto:zjxie2011@163.com)

<sup>d</sup> Shenzhen Engineering Laboratory of Phosphorene and Optoelectronics; International Collaborative Laboratory of 2D Materials for Optoelectronics Science and Technology of Ministry of Education, Shenzhen Institute of Translational Medicine, Department of Otolaryngology, Shenzhen Second People's Hospital, the First Affiliated Hospital, Institute of Microscale Optoelectronics, Shenzhen University, Shenzhen, 518060, China.

<sup>†</sup> Li Su and Sainan Qin contributed equally to this work.

## 1. Experimental Sections

### 1.1. Kinetic analysis of peroxidase-like activity of NiCo LDHs

The kinetic data were obtained by measuring the absorbance at 417 nm in time-course mode. The detailed experiment process was carried out using 50  $\mu\text{L}$  ABTS (10 mM), 100  $\mu\text{L}$   $\text{H}_2\text{O}_2$  (0.02 M), 100  $\mu\text{L}$  0.5  $\text{mg mL}^{-1}$  NiCo LDHs with different mole ratio in 2.75 mL water for 5 min at 37°C, with fixed ABTS and variation  $\text{H}_2\text{O}_2$  or vice versa. Using the Lineweaver–Burk plot ( $1/v = K_m/V_{\max} (1/[S] + 1/K_m)$ ) to obtain the Michaelis–Menten constant. Among the plots,  $v$  represents the initial velocity,  $V_{\max}$  represents the maximal reaction velocity,  $[S]$  represents the substrate concentration.  $K_m$  represents Michaelis–Menten constant.  $K_m$  is an indicator of enzyme affinity for its substrate, the smaller the value of  $K_m$ , the stronger the affinity between the enzyme and the substrate.

### 1.2. Animal feeding conditions

The kunming mice purchased Hualan Biology, and the animal protocol was reviewed and approved by Henan Normal University, Institute of Animal Care and Use Committee, which conformed to the NIH Guide for the Care and Use of Laboratory Animals. The mice were kept at the Experimental Animal Center of Henan Normal University. Feeding conditions were set at a temperature ( $24 \pm 3$  °C) and humidity ( $35 \pm 5\%$ ) with 12 h day/night cycle; mice were free to get food and water.

### 1.3. Membrane depolarization

Firstly, the cultured bacteria were added to 96-well plates, followed by the addition of DiSC<sub>3</sub>(5) (0.2  $\mu\text{M}$ ) staining, and the change of fluorescence intensity ( $\lambda_{\text{excitation}}=622$  nm,  $\lambda_{\text{emission}}=673$  nm) was measured by a multi-mode enzyme marker until it stabilized. After that, PBS,  $\text{H}_2\text{O}_2$  (0.02 M), Ni<sub>4</sub>Co<sub>6</sub> LDHs (0.5  $\text{mg/mL}$ ) and Ni<sub>4</sub>Co<sub>6</sub> LDHs+ $\text{H}_2\text{O}_2$  were added to different groups, and then the fluorescence intensity changes were continued to be measured until stabilization.

## 2. Supplementary Figures

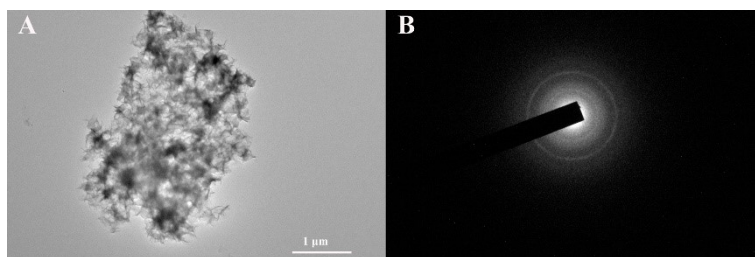

**Fig. S1** (A) TEM image and (B) Selected Area Electron Diffraction (SAED) pattern of Ni<sub>4</sub>Co<sub>6</sub> LDHs.

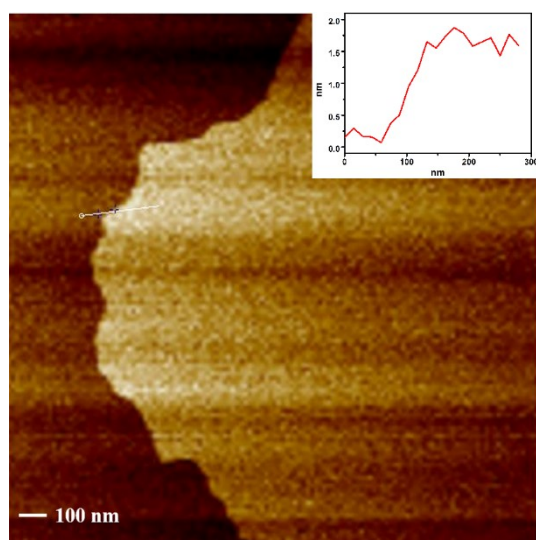

**Fig. S2** AFM image of  $\text{Ni}_{10}\text{Co}_0$  LDHs.

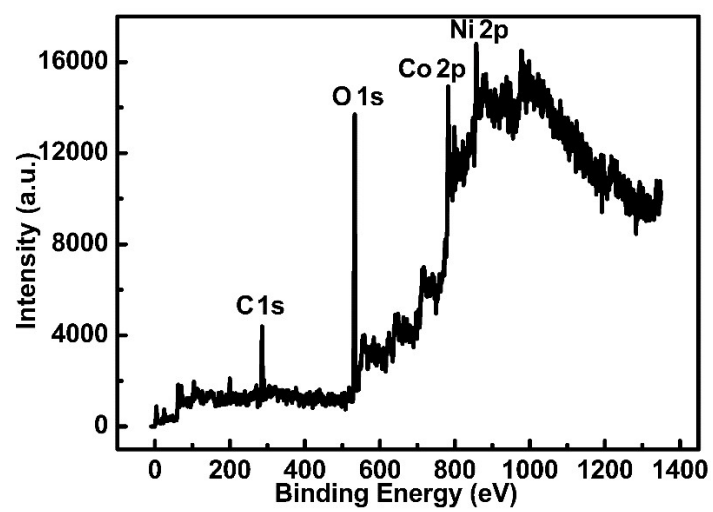

Fig. S3 XPS spectra of NiCo LDHs.

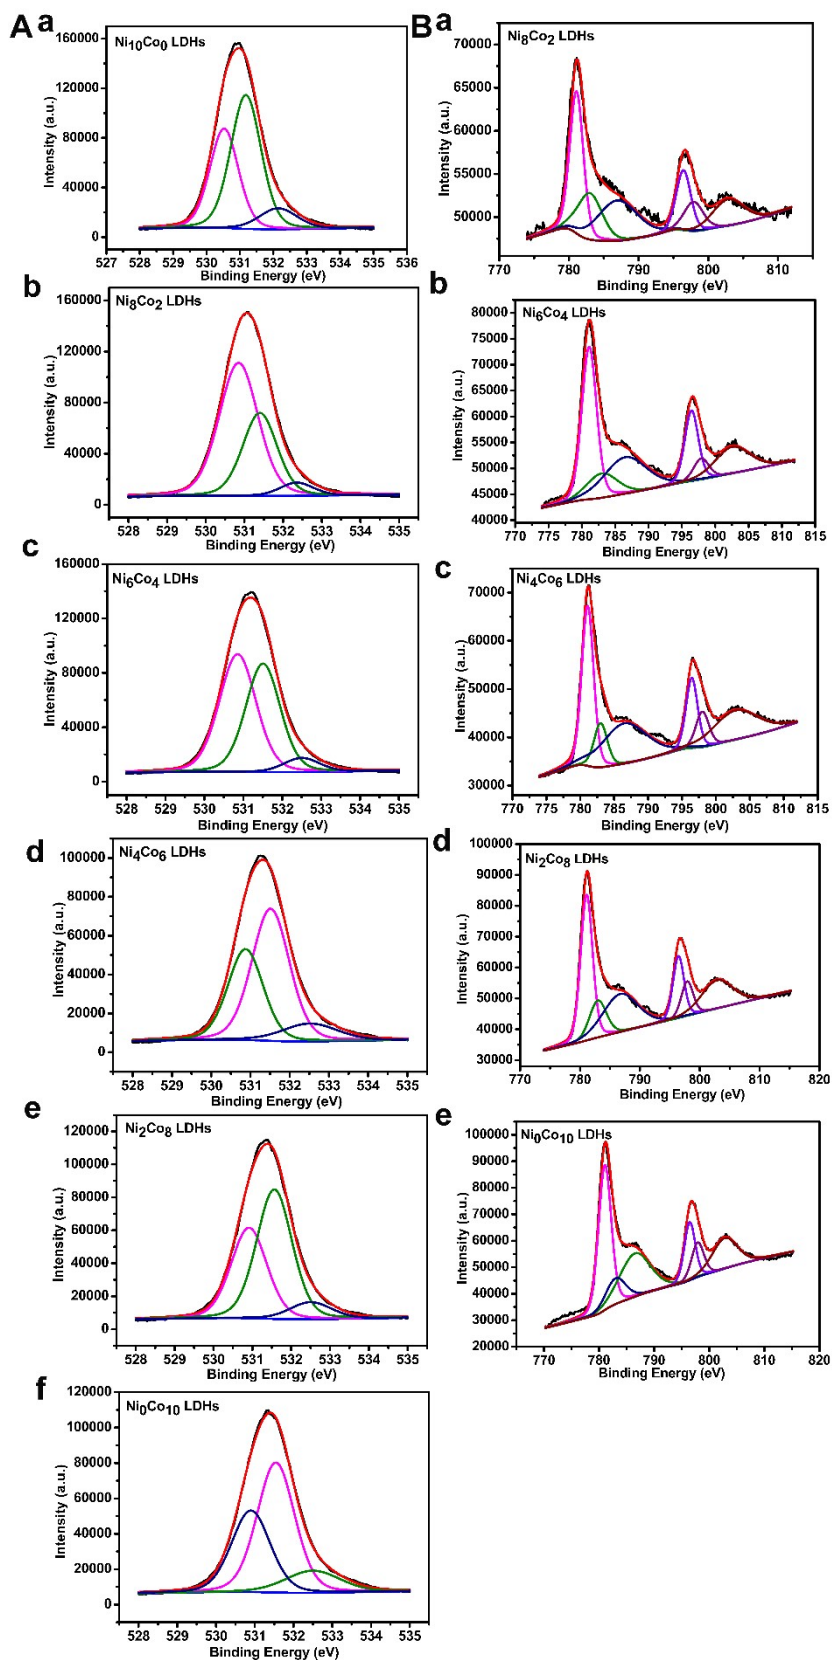

**Fig. S4** O 1s spectra (A) and Co 2p spectra (B) for different ratios of NiCo LDHs.

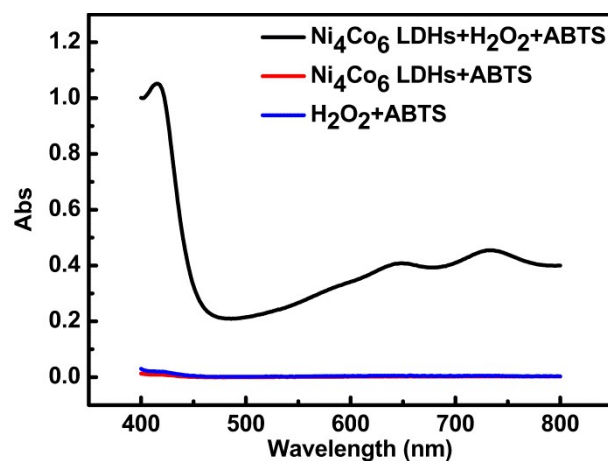

**Fig. S5** Determination of the absorbance at 417 nm of the ABTS chromogenic system catalyzed by different systems in a neutral environment.

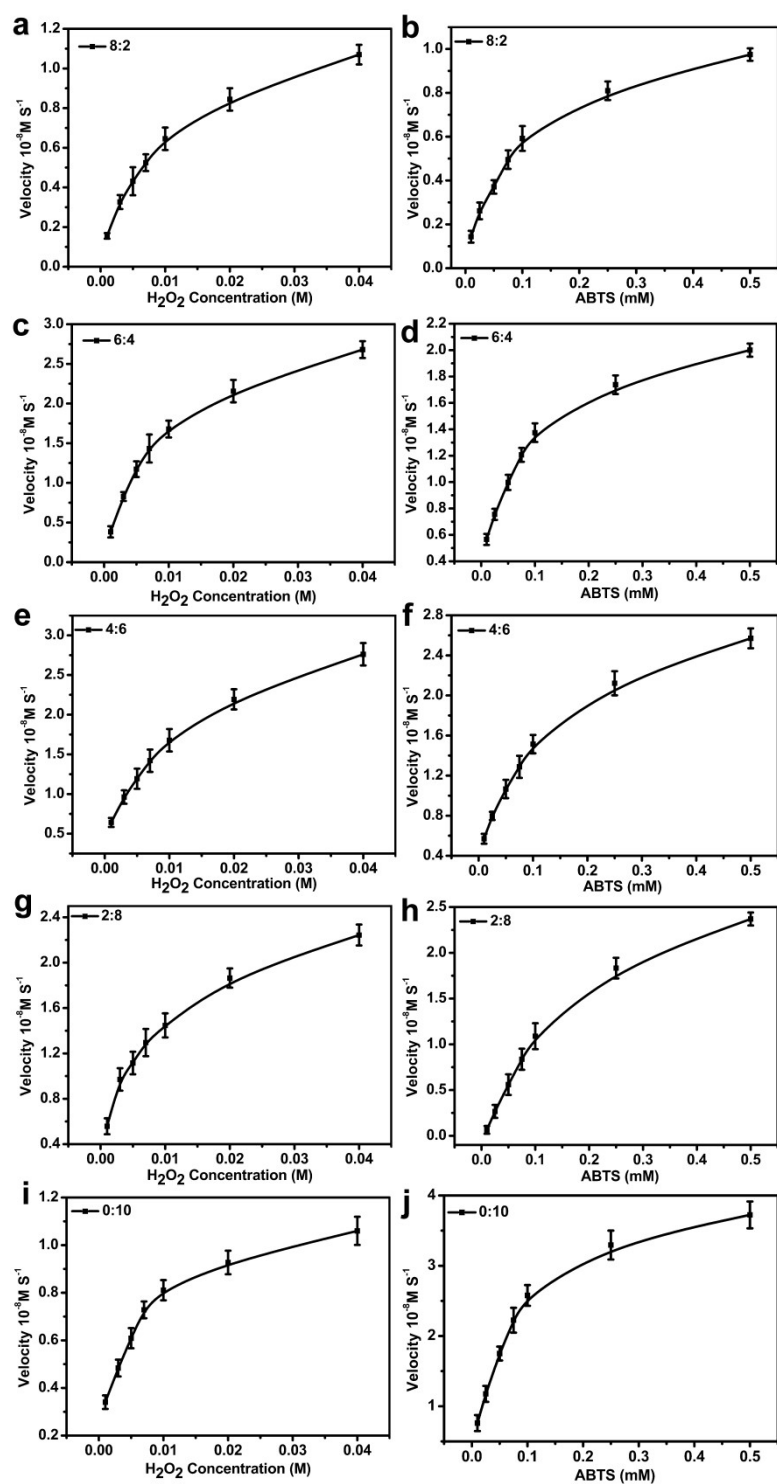

**Fig. S6** The steady-state kinetic curves of NiCo LDHs with different molar ratios of Ni and Co by changing the concentration of the substrate  $\text{H}_2\text{O}_2$  and ABTS.

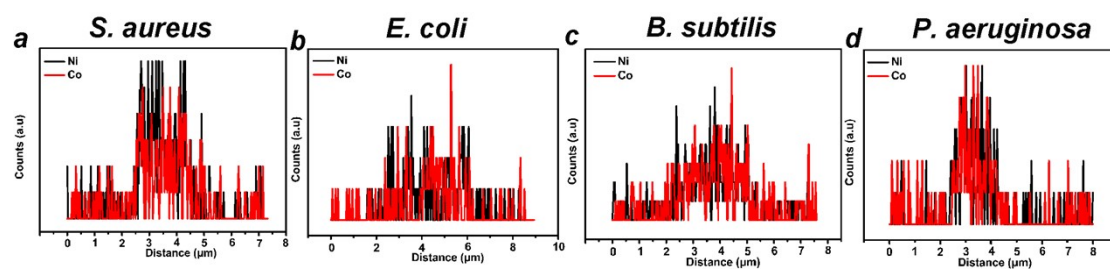

**Fig. S7** The distribution of elements along the indicated lines for the samples.

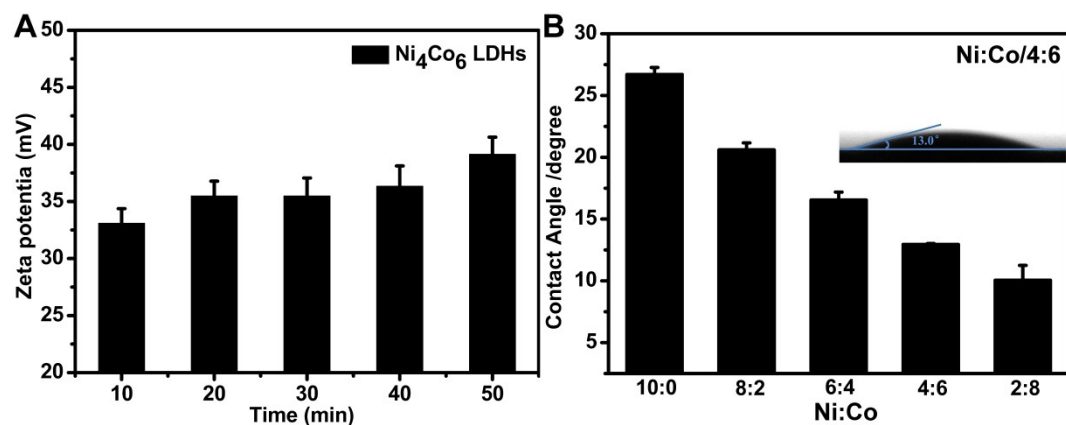

**Fig. S8** (A) Time-changing potential of Ni<sub>4</sub>Co<sub>6</sub> LDHs in aqueous solution. (B) Contact angle of NiCo LDHs with different molar ratios.

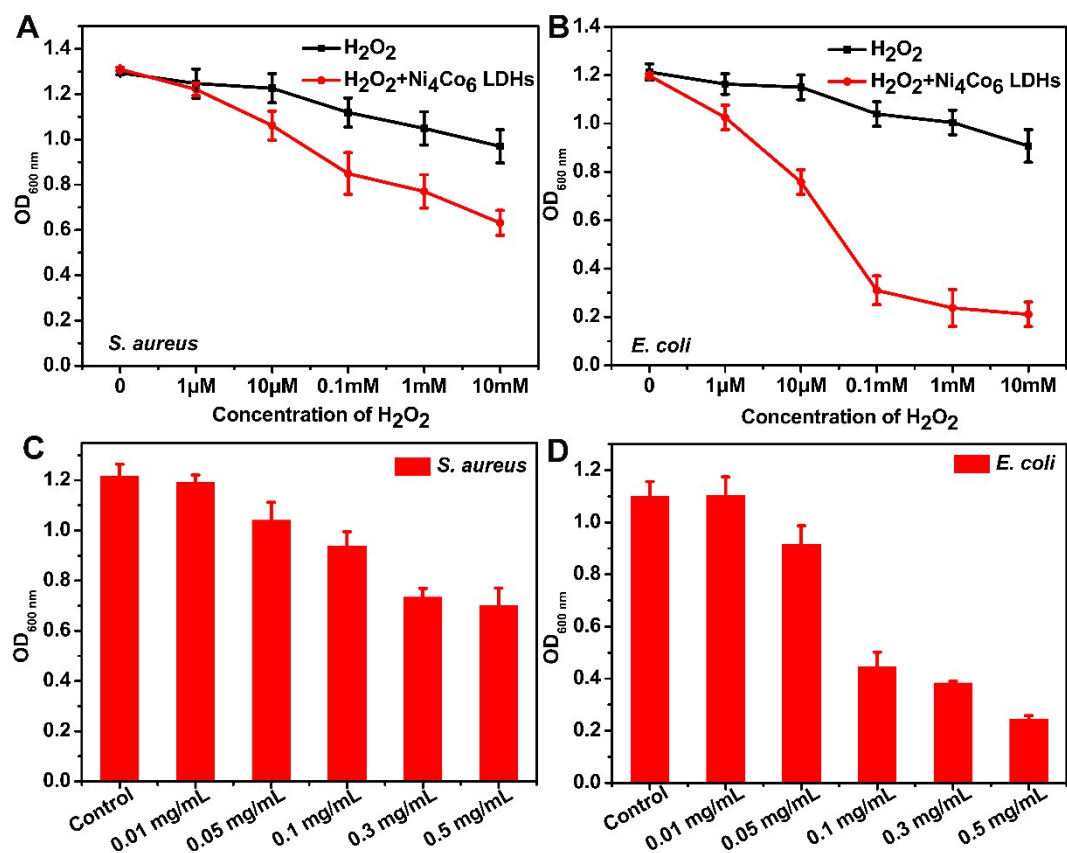

**Fig. S9** OD<sub>600nm</sub> values of bacteria treated with different systems for (A) *S. aureus* and (B) *E. coli* under different concentrations of  $H_2O_2$ . MIC of NiCo LDHs nanozymes to (C) *S. aureus* and (D) *E. coli*.

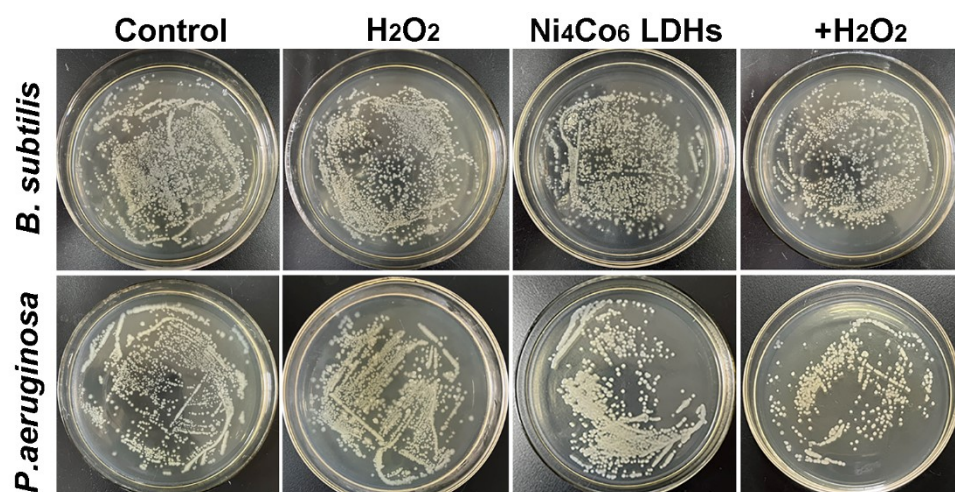

**Fig. S10** Photographs of colonies of *B. subtilis* and *P. aeruginosa* on agar plates under different culture systems.

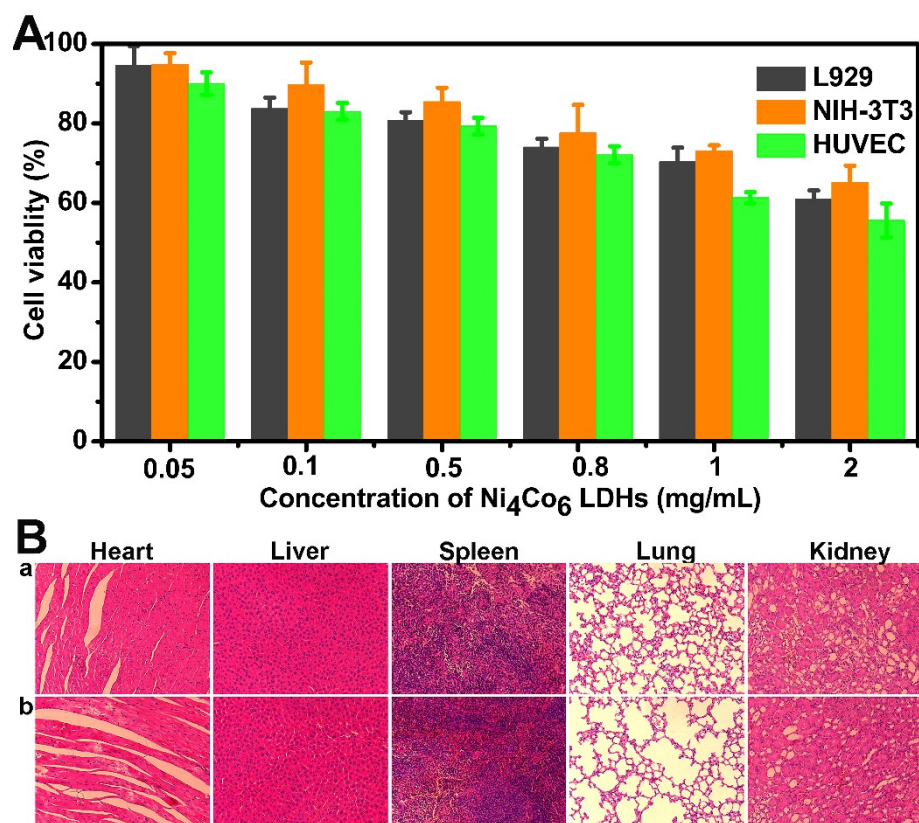

**Fig. S11** (A) The cytotoxicity graph of different cells treated with different concentrations of  $\text{Ni}_4\text{Co}_6$  LDHs. (B) (H&E) photos of  $\text{Ni}_4\text{Co}_6$  LDHs on different organs of mice, (a) Control; (b)  $\text{Ni}_4\text{Co}_6$  LDHs. All H&E images were obtained under magnification of 20.

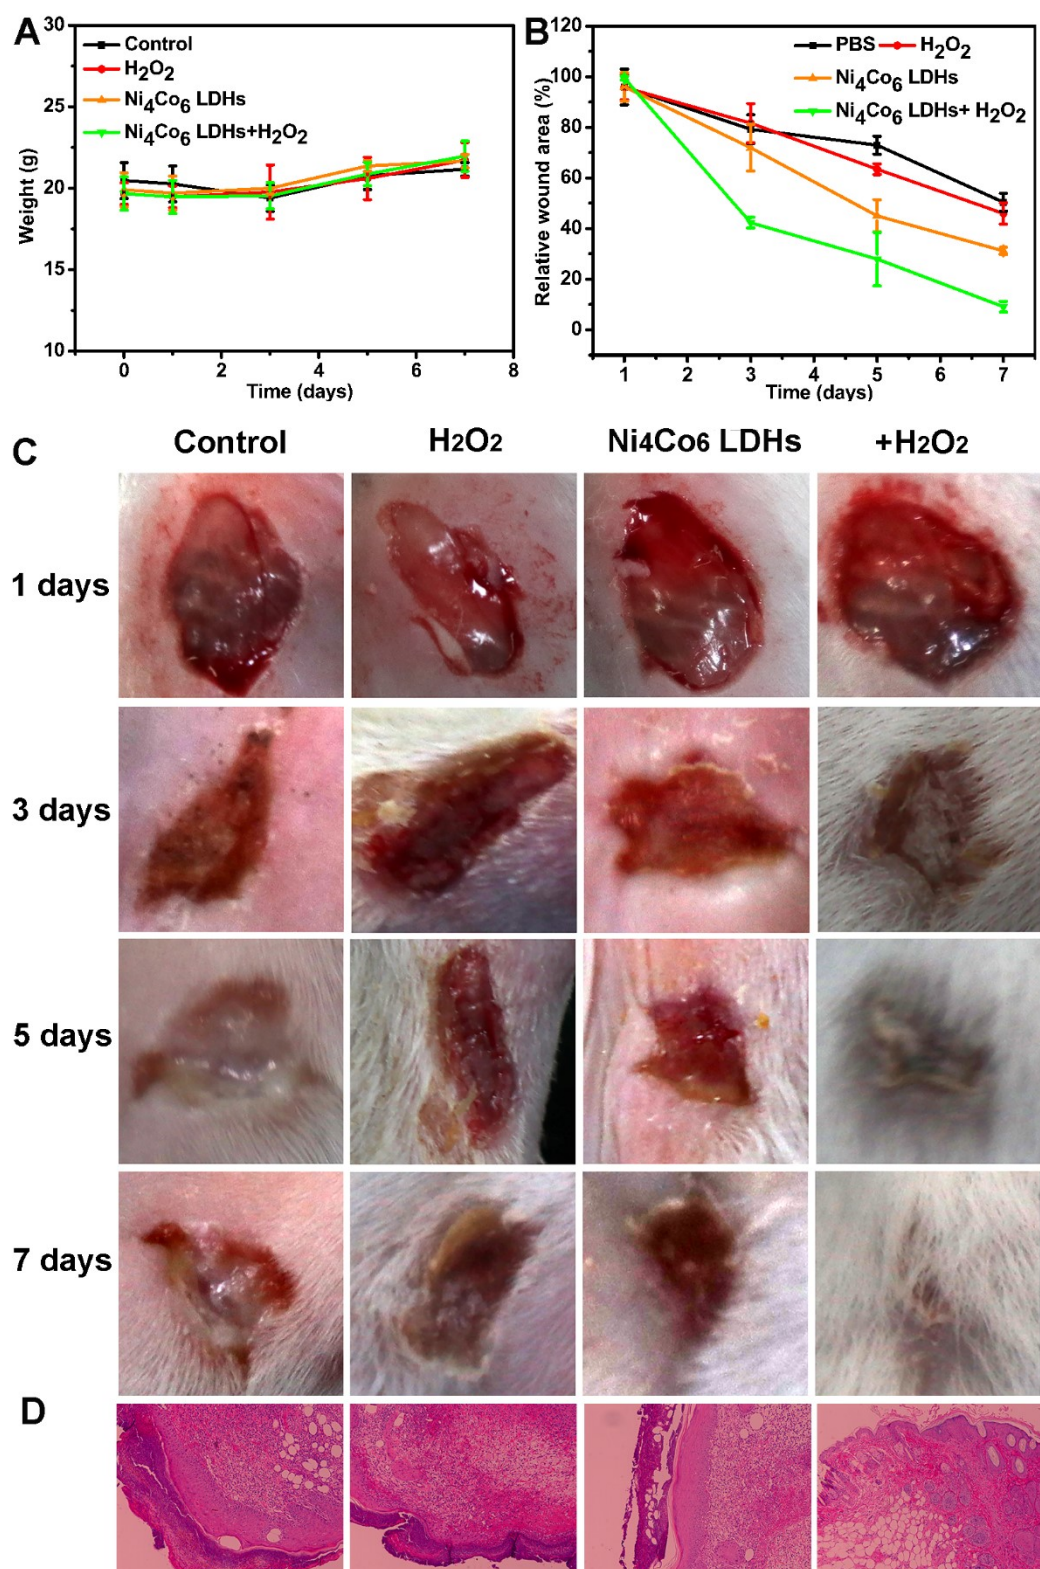

**Fig. S12** Changes in (A) body weight and (B) wound area of mice with different treatments over time. (C) Photographs of mouse wounds after treatment with different systems and (D) H&E staining of wound tissue. All H&E images were obtained under magnification of 20.

### 3. Supplementary Tables

**Table S1** Specific surface area and pore volume parameters of NiCo LDH samples with different molar ratio of Ni and Co.

| Sample                                                   | Ni <sub>10</sub> Co <sub>0</sub> | Ni <sub>8</sub> Co <sub>2</sub> | Ni <sub>6</sub> Co <sub>4</sub> | Ni <sub>4</sub> Co <sub>6</sub> | Ni <sub>2</sub> Co <sub>8</sub> | Ni <sub>0</sub> Co <sub>10</sub> |
|----------------------------------------------------------|----------------------------------|---------------------------------|---------------------------------|---------------------------------|---------------------------------|----------------------------------|
| Specific Surface Area (cm <sup>2</sup> g <sup>-1</sup> ) | 162.3                            | 152.1                           | 220.5                           | 186.2                           | 164.1                           | 101.3                            |
| Pore Volume(cm <sup>3</sup> g <sup>-1</sup> )            | 0.708                            | 0.859                           | 1.071                           | 1.156                           | 1.028                           | 0.658                            |
